# Supplementary material
Source: PubMed Central journal article supplement (PMC10312065)

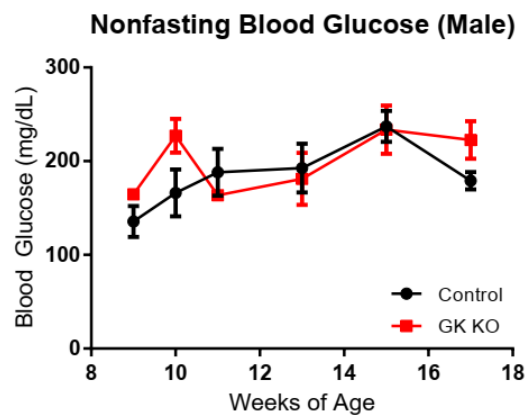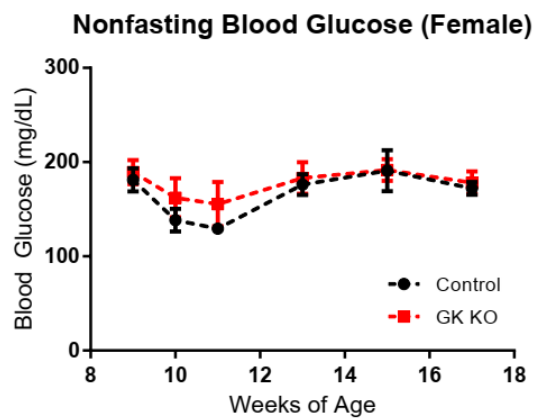

Supplemental Figure 1

Supplement: NIHMS1908875-supplement-Supplemental_Figure_1.pdf [file NIHMS1908875-supplement-Supplemental_Figure_1.pdf]
